# Supplementary material for: Coordination polymers from alkaline-earth nodes and pyrazine carboxylate linkers
Source: Royal Society of Chemistry journal article supplement (doi:10.1039/c8dt02177e), 2018-01-01
Supplement: c8dt02177e2.pdf [file c8dt02177e2.pdf]

## 2,5-H<sub>2</sub>pzdc

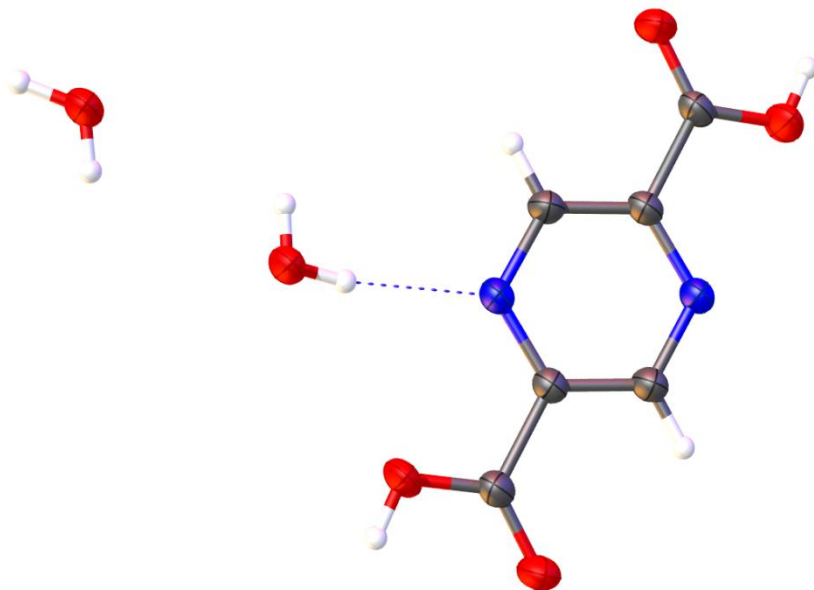

The molecular structure of 2,5-H<sub>2</sub>pzdc

2,5-pzdcH<sub>2</sub>

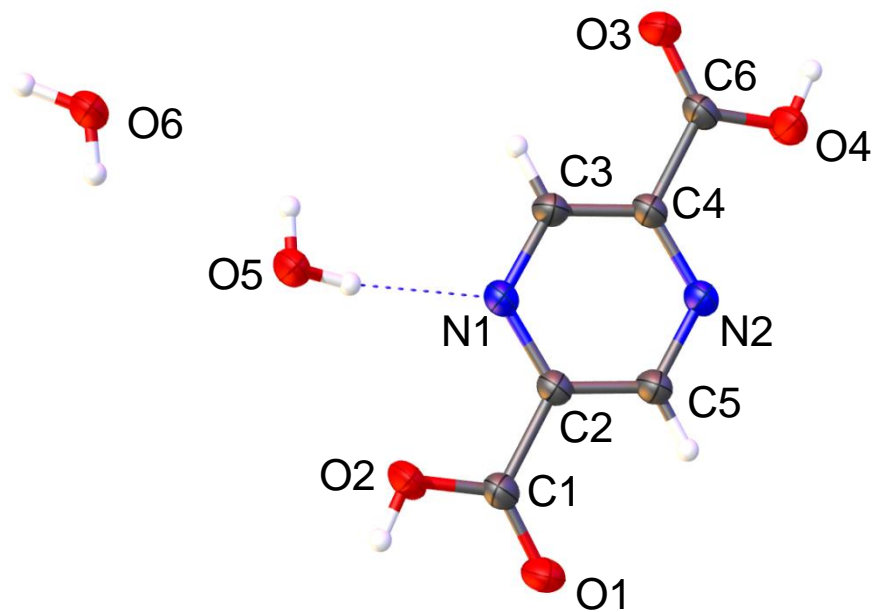

The molecular structure of 2,5-H<sub>2</sub>pzdc .

2,5-pzdcH<sub>2</sub>

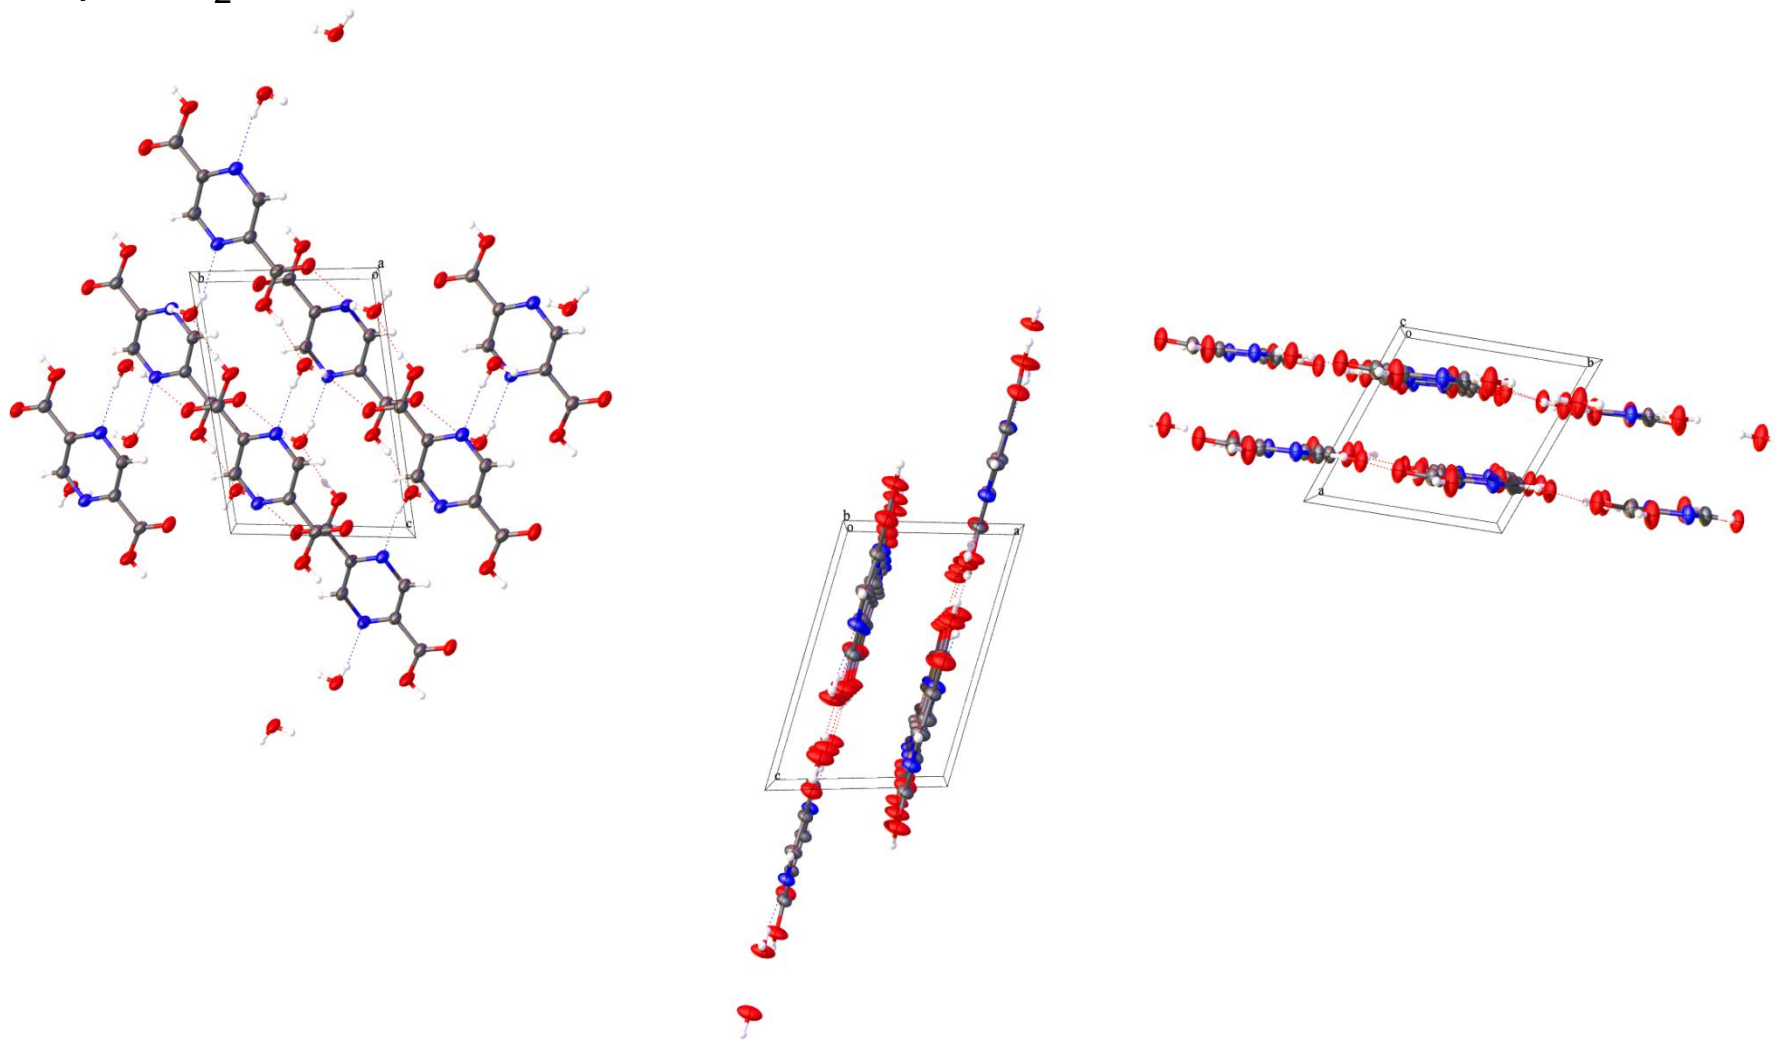

Packing along *a*, *b*, *c* axes (Olex2-POV-Ray representation)

[Ca(2,5-pzdc)(H<sub>2</sub>O)<sub>2</sub>] $\cdot$ H<sub>2</sub>O (1)

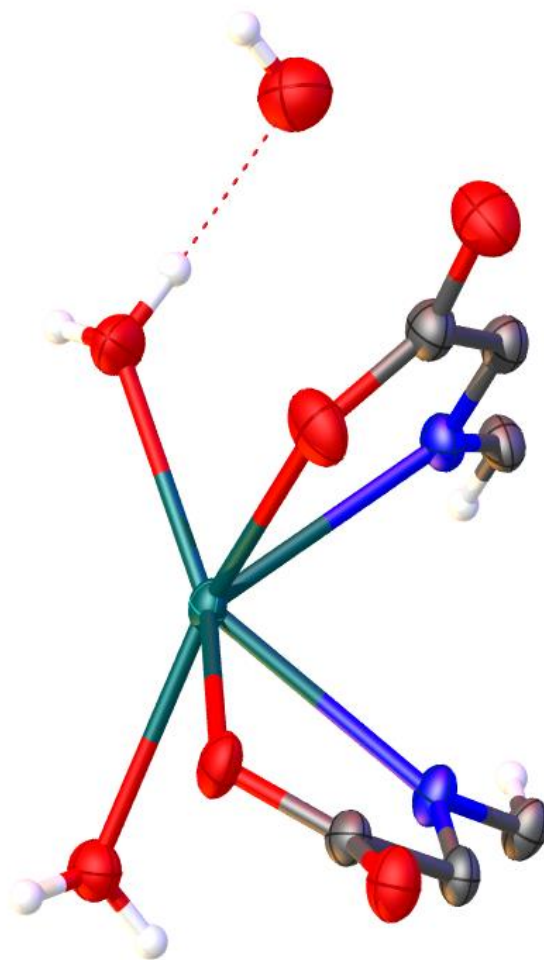

[Ca(2,5-pzdc)(H<sub>2</sub>O)<sub>2</sub>].H<sub>2</sub>O (1)

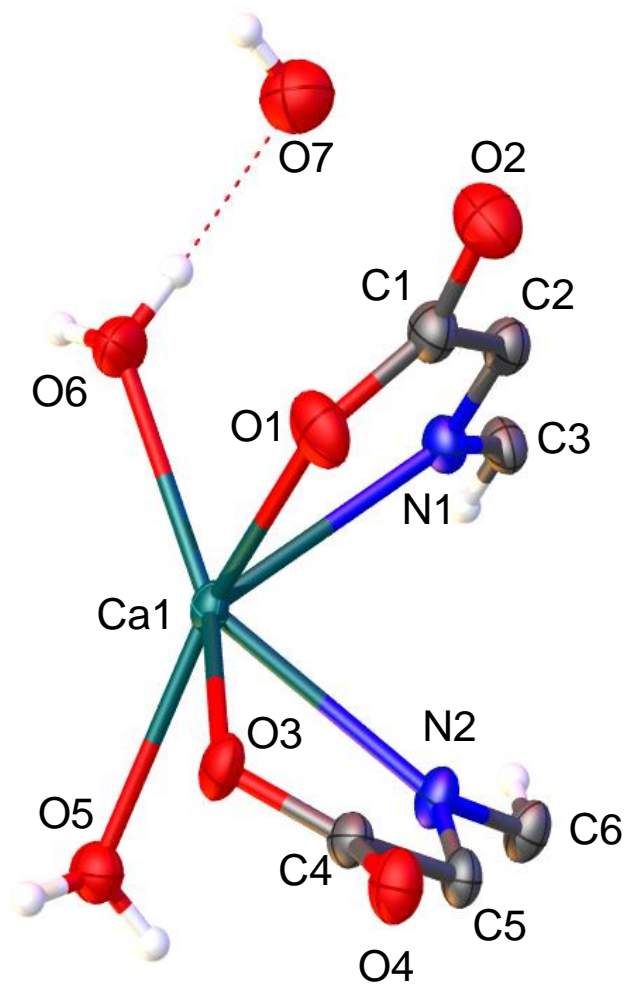

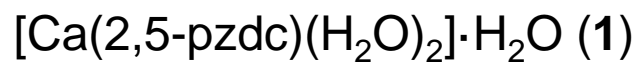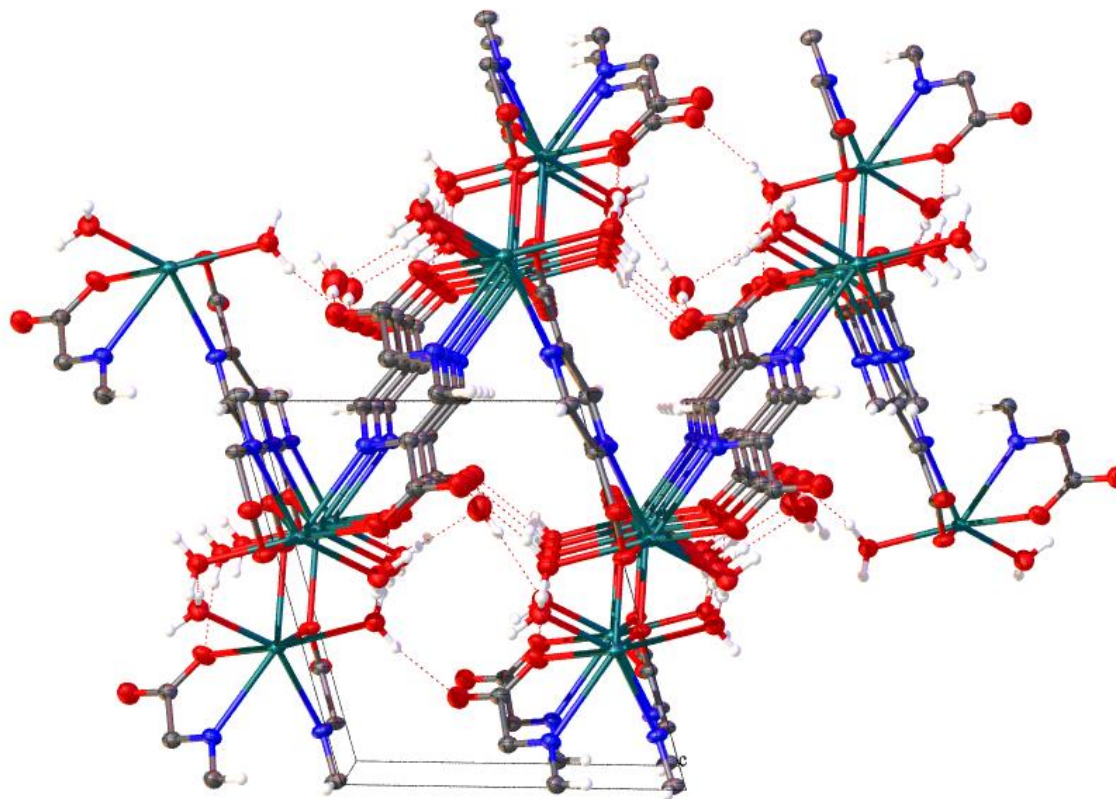

Packing along  $a$  axis (Olex2-POV-Ray representation)

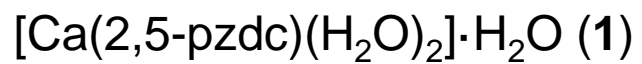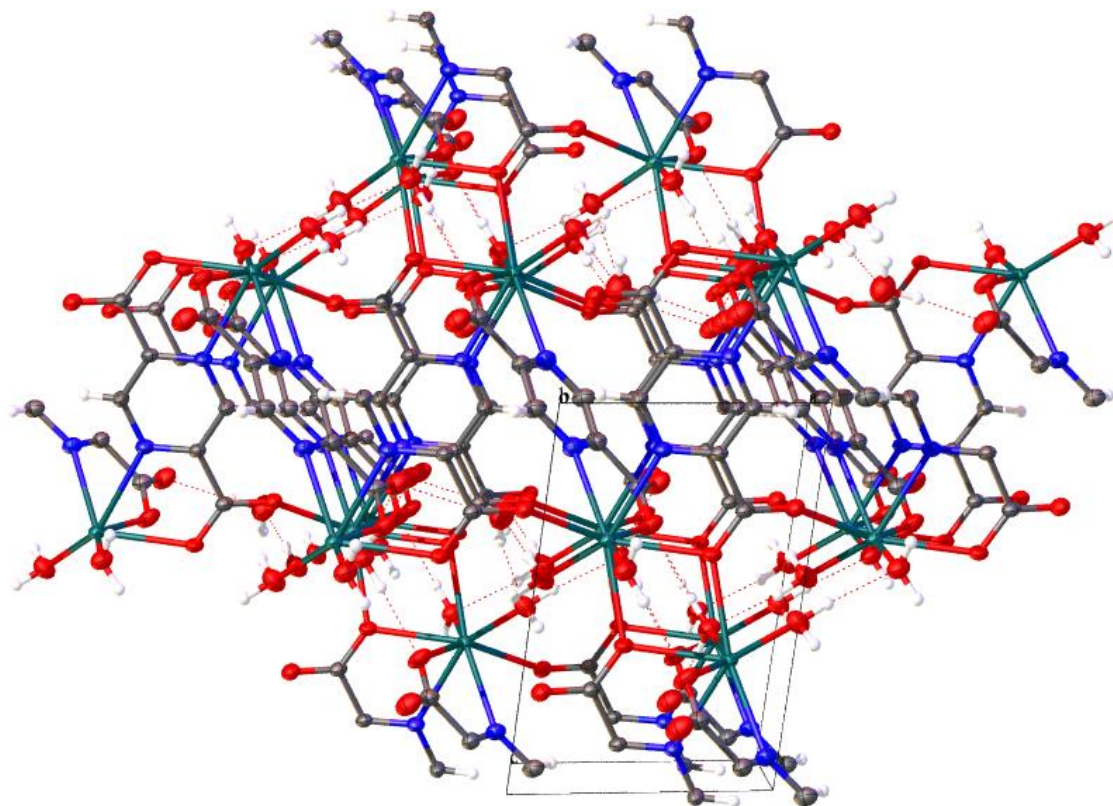

Packing along *b* axis (Olex2-POV-Ray representation)

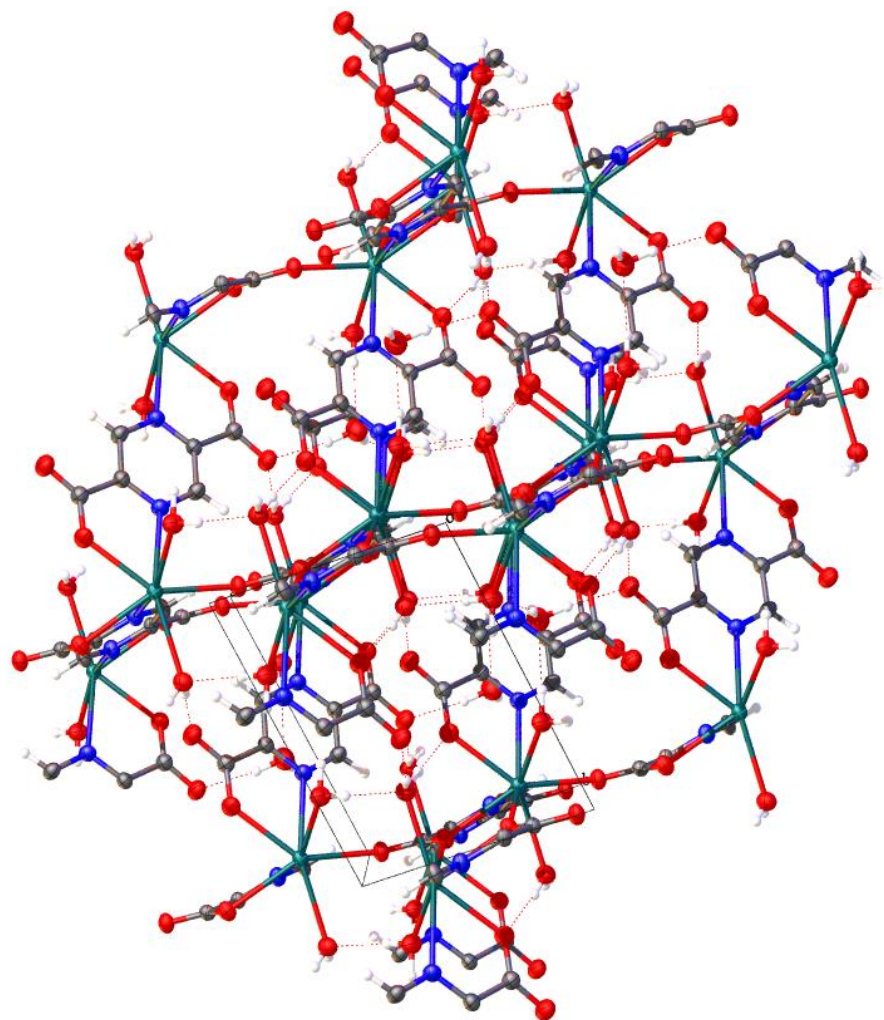

Packing along c axis (Olex2-POV-Ray representation)



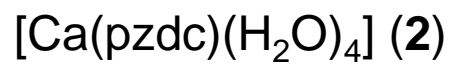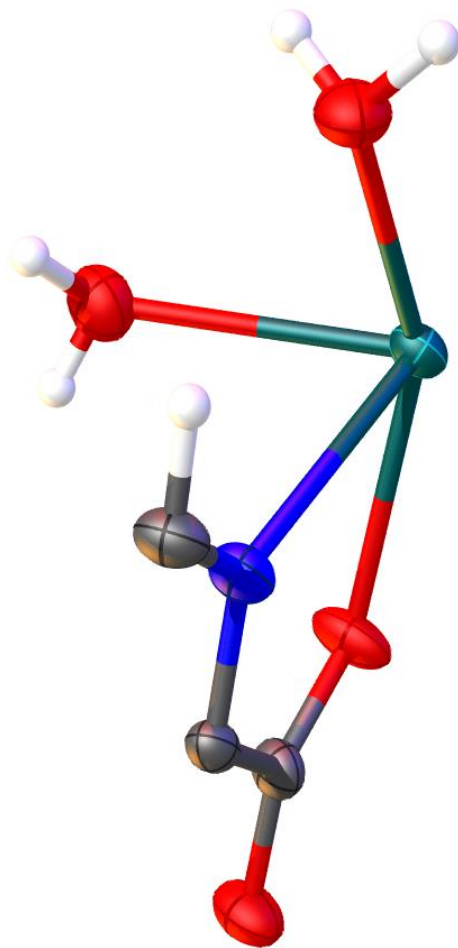

[Ca(pzdc)(H<sub>2</sub>O)<sub>4</sub>] (**2**)

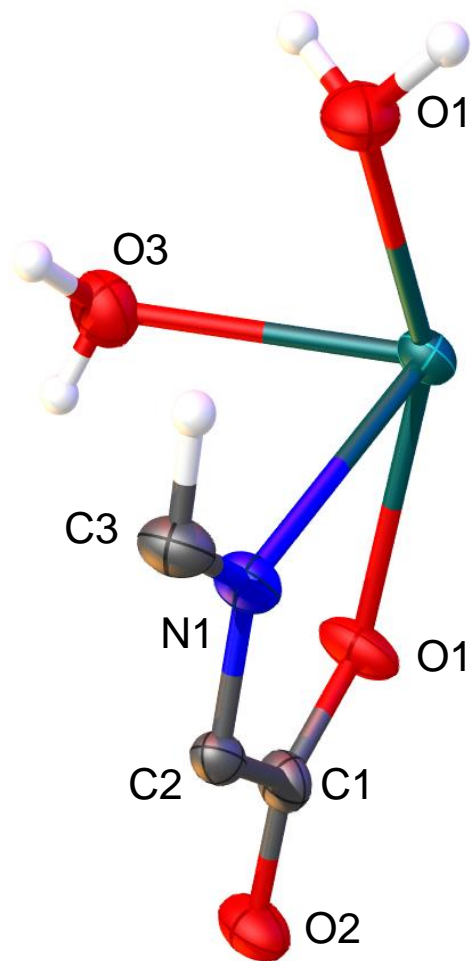

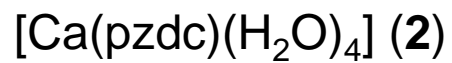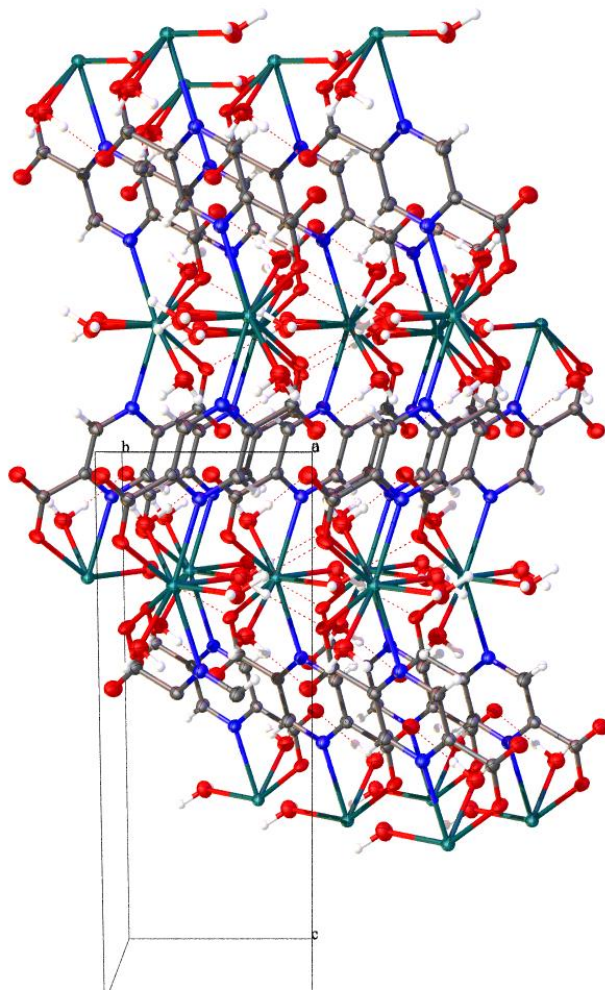

Packing along *a* axis (Olex2-POV-Ray representation)

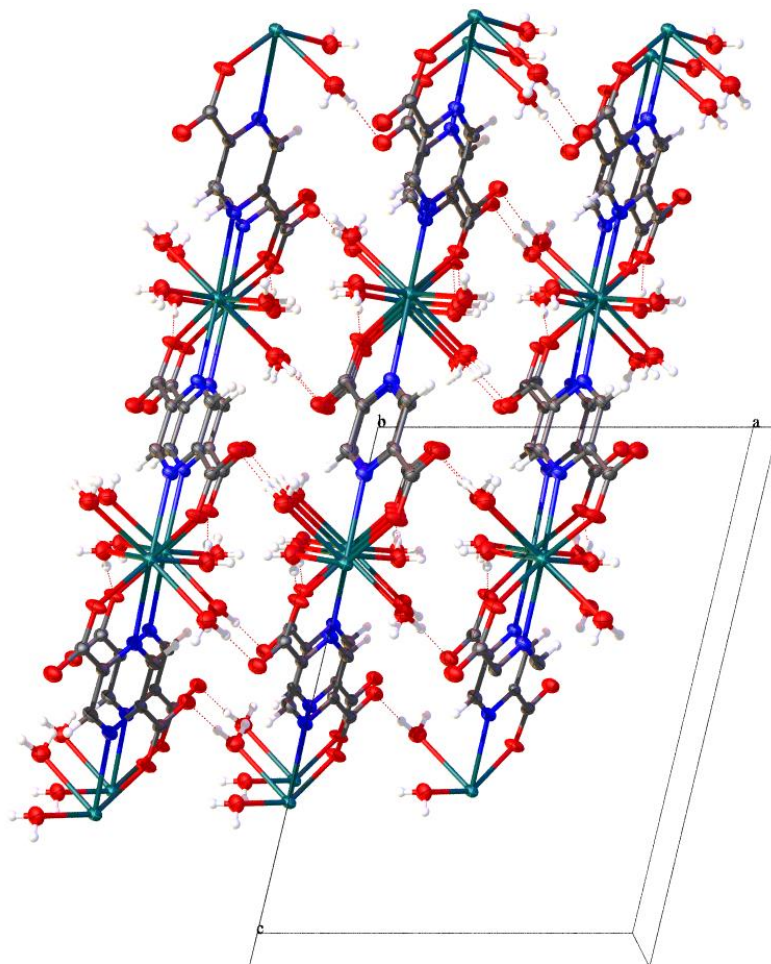

Packing along *b* axis (Olex2-POV-Ray representation)

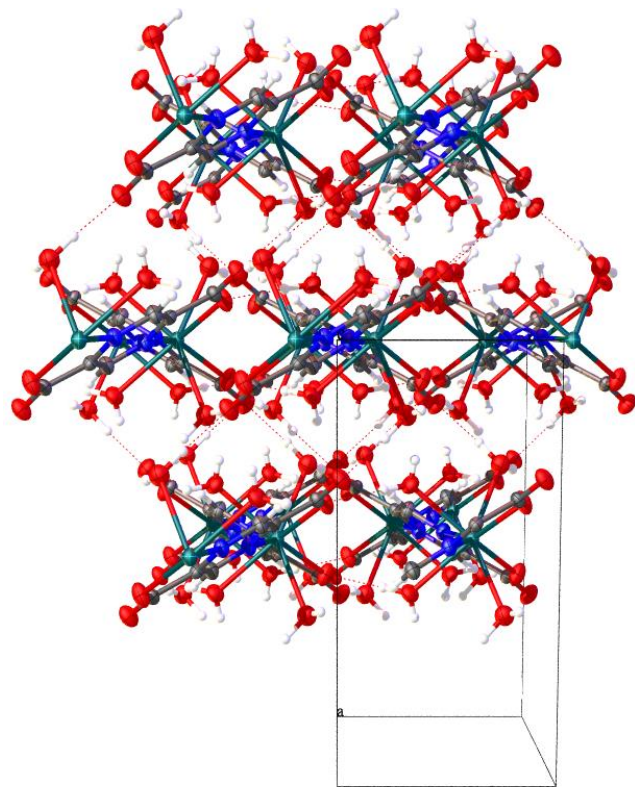

Packing along c axis (Olex2-POV-Ray representation)

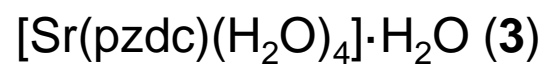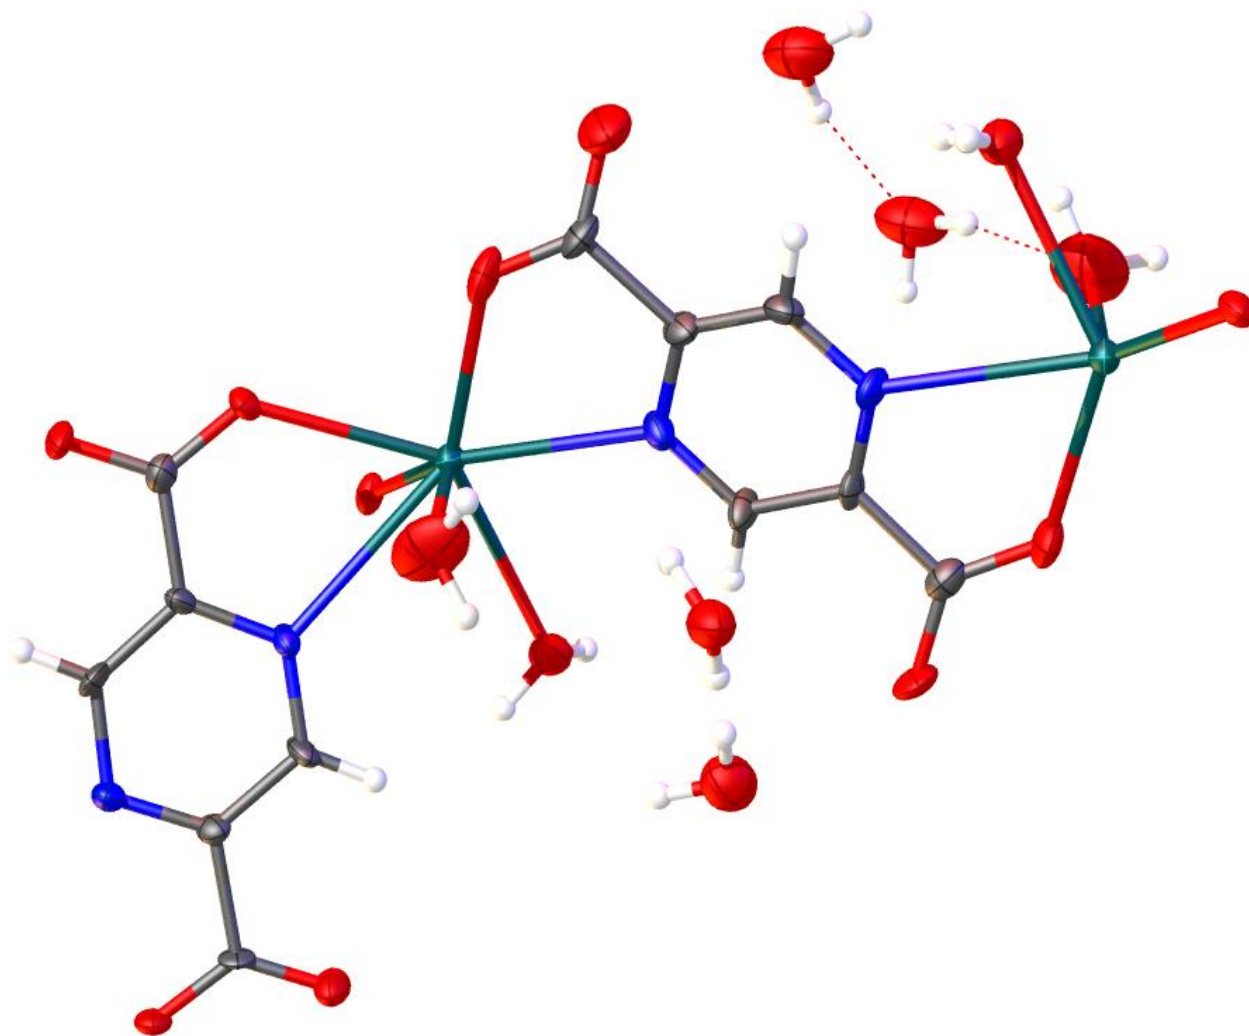

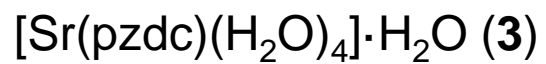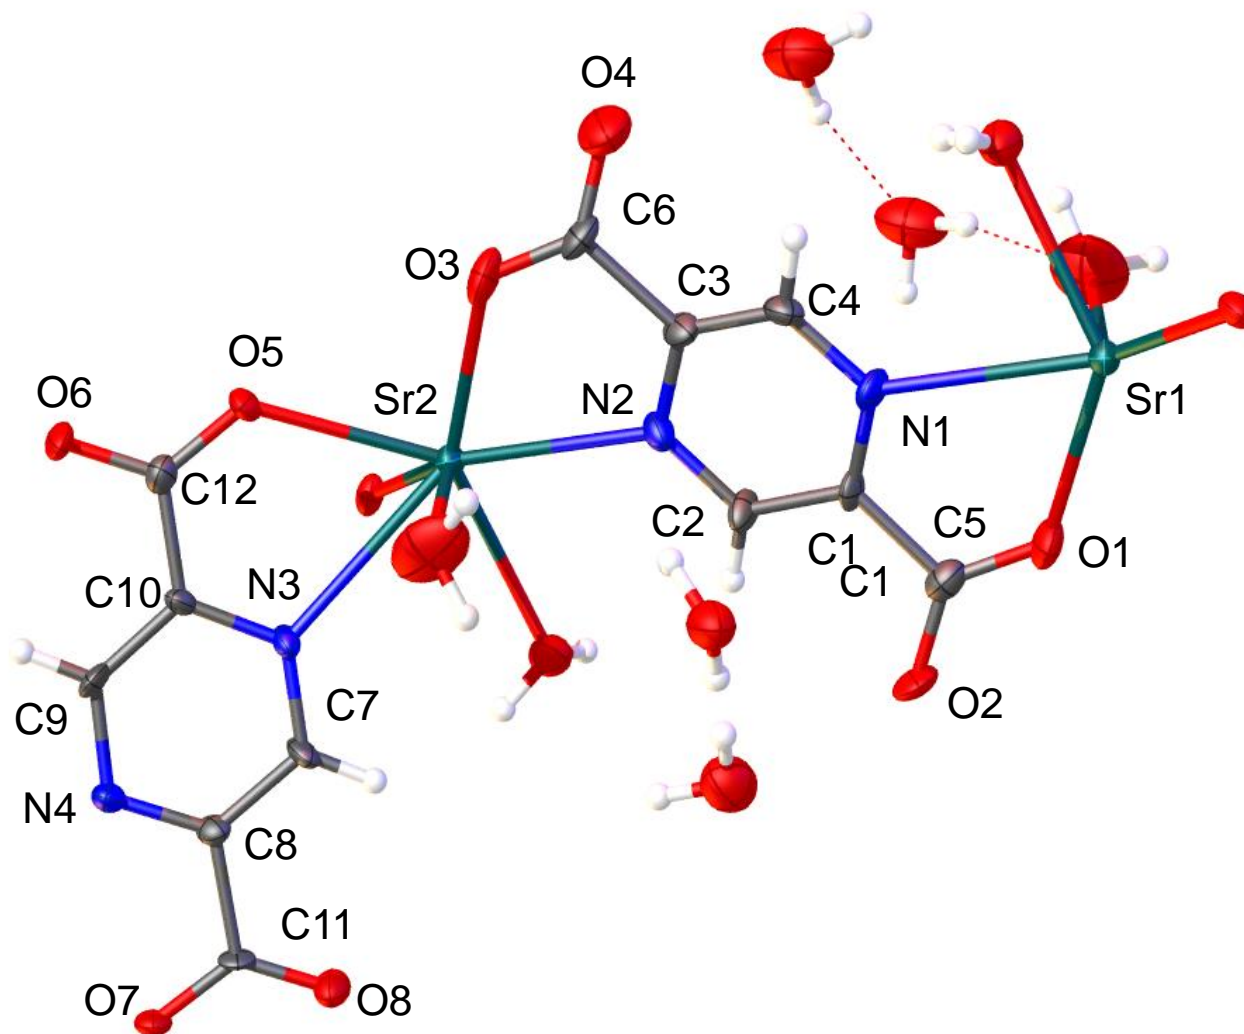



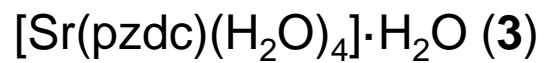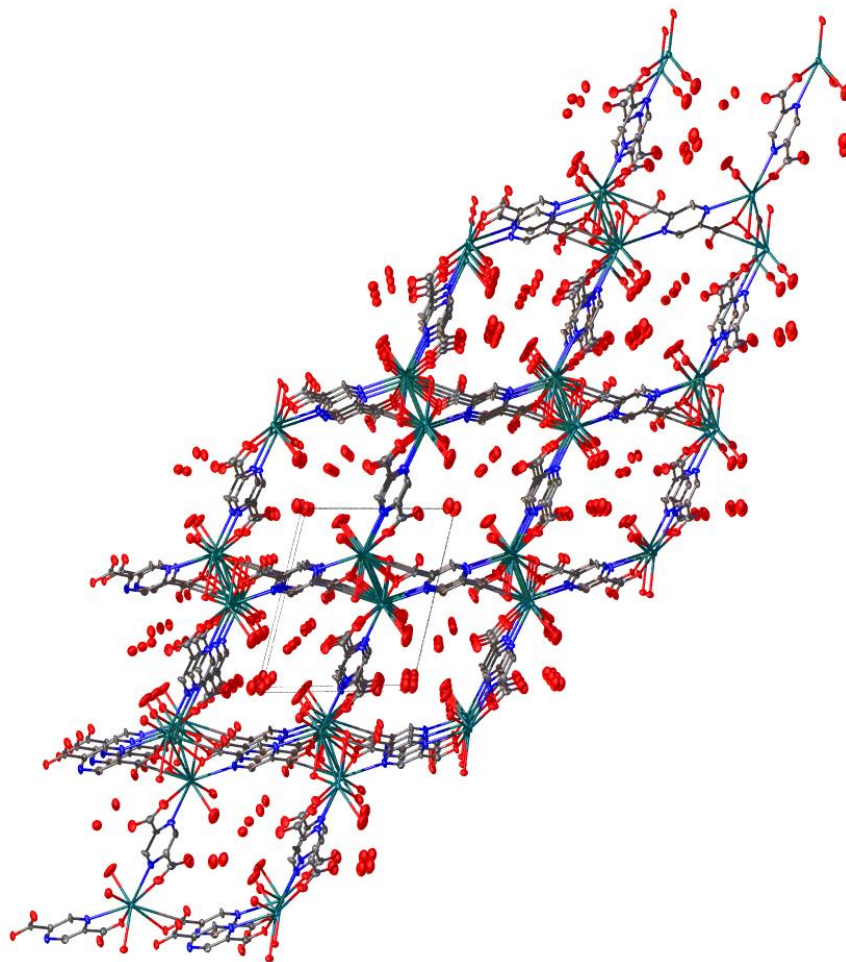

Packing along  $a$  axis (Olex2-POV-Ray representation)



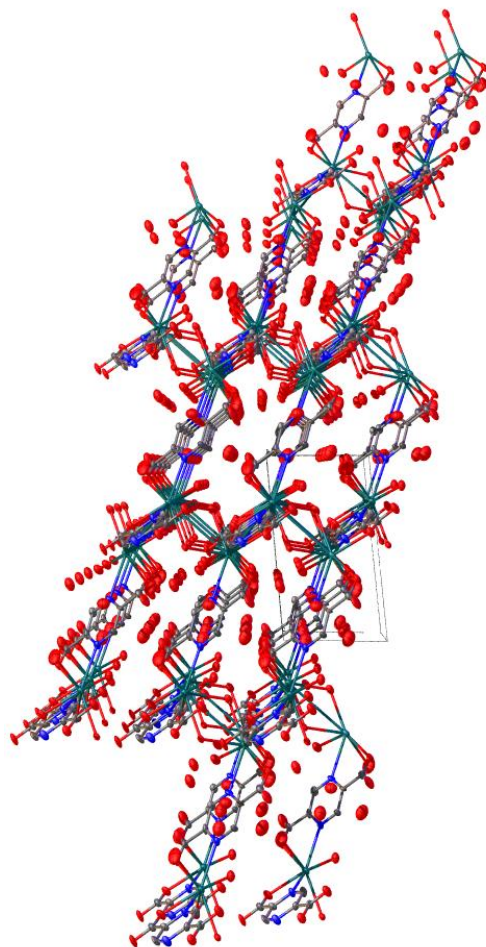

Packing along *b* axis (Olex2-POV-Ray representation)

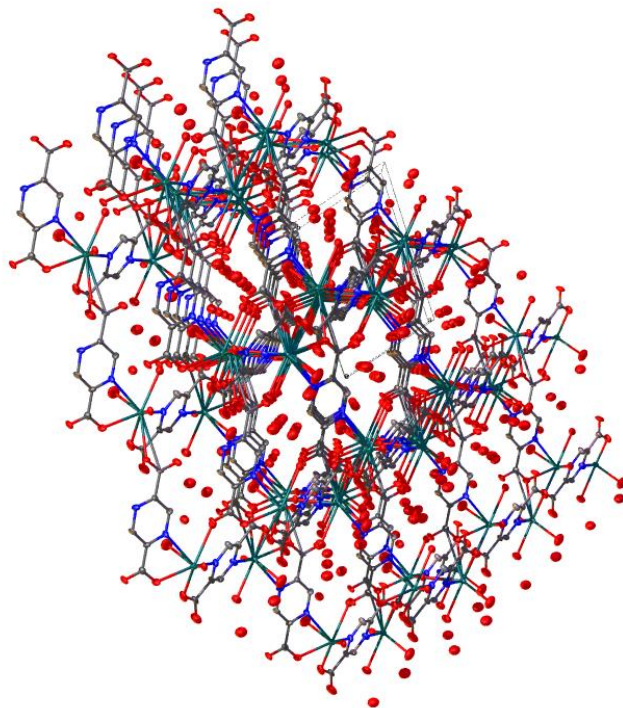

Packing along c axis (Olex2-POV-Ray representation)

[Ba(pzdc)(H<sub>2</sub>O)<sub>2</sub>] (5)

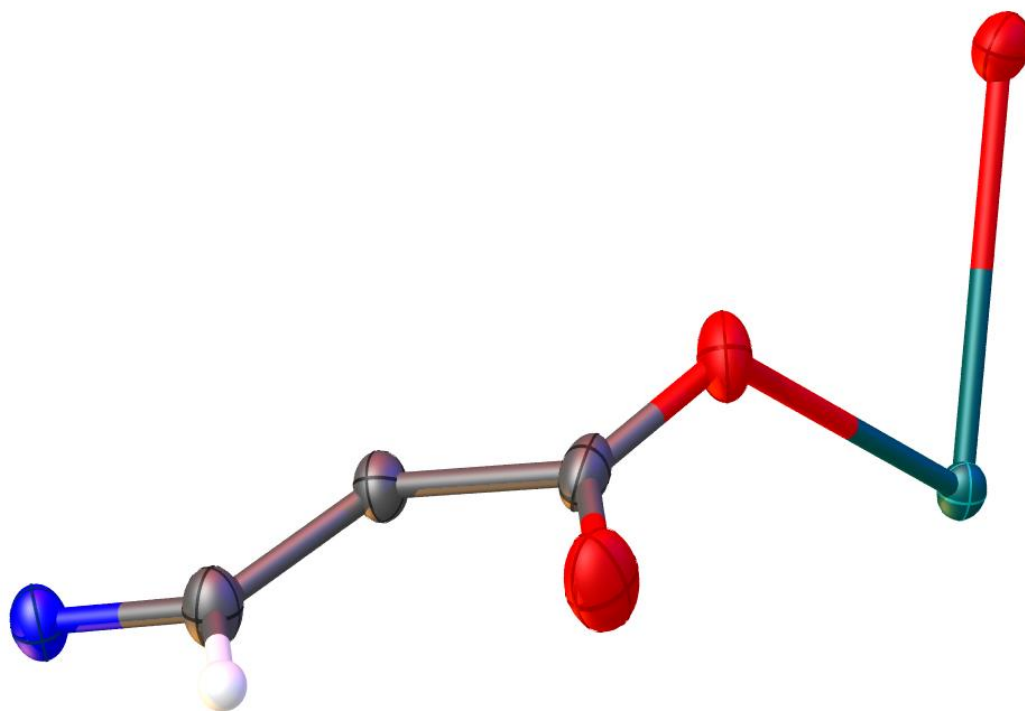

$$[\text{Ba}(\text{pzdc})(\text{H}_2\text{O})_2] \text{ (5)}$$
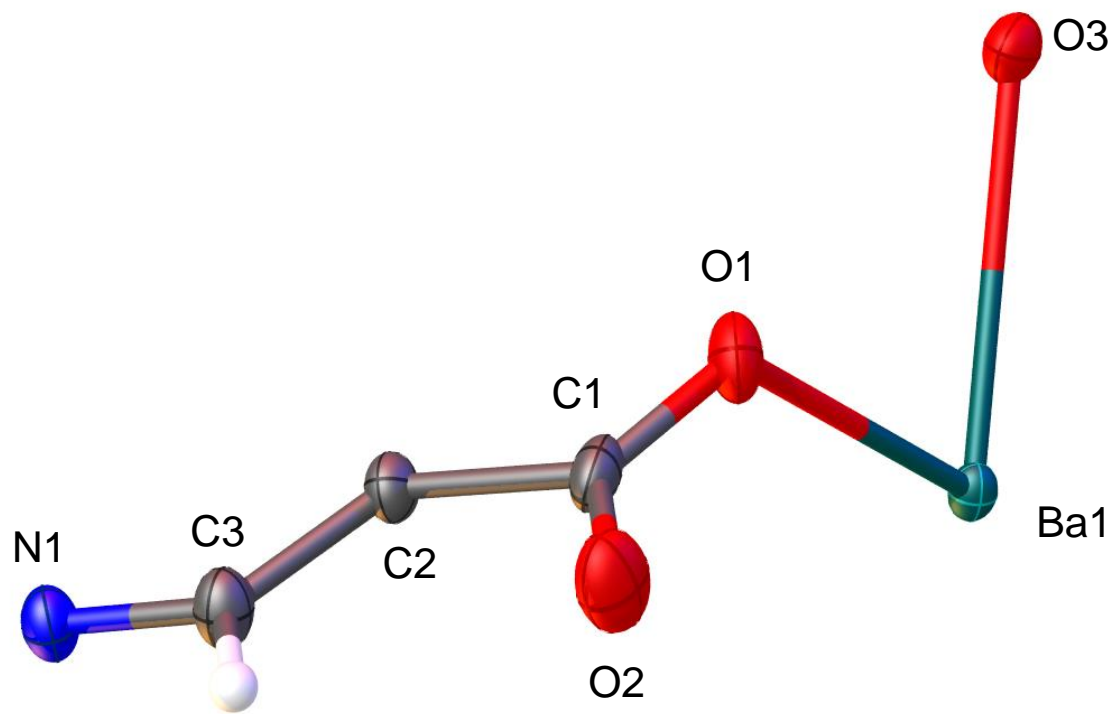

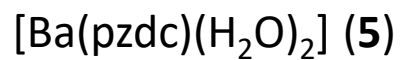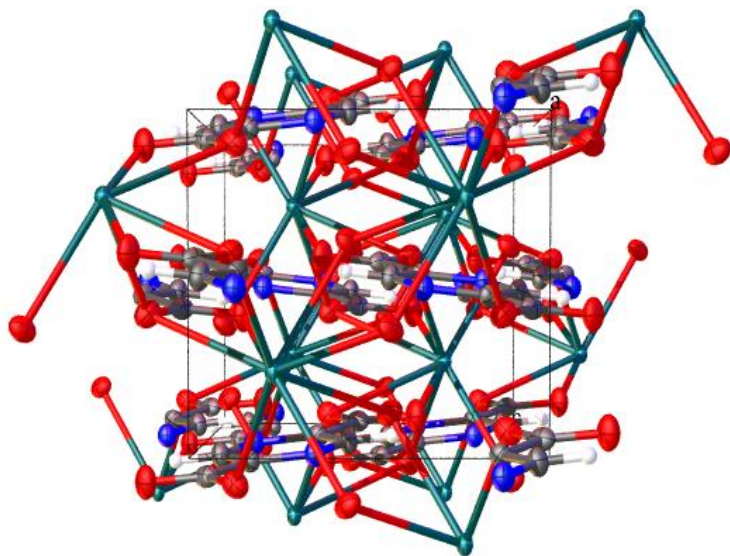

Packing along *a* axis (Olex2-POV-Ray representation)

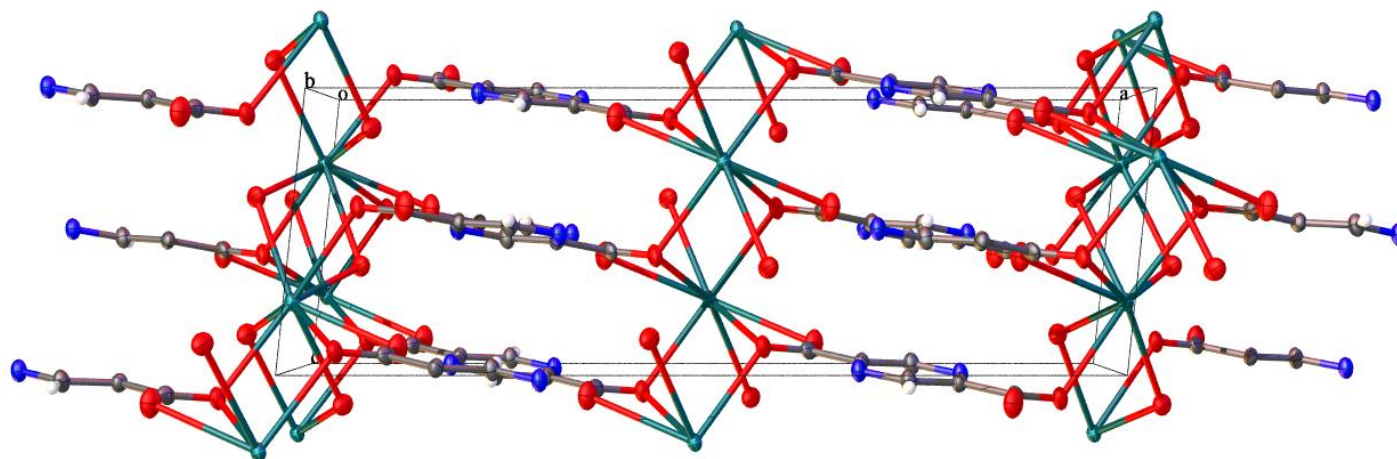

Packing along *b* axis (Olex2-POV-Ray representation)

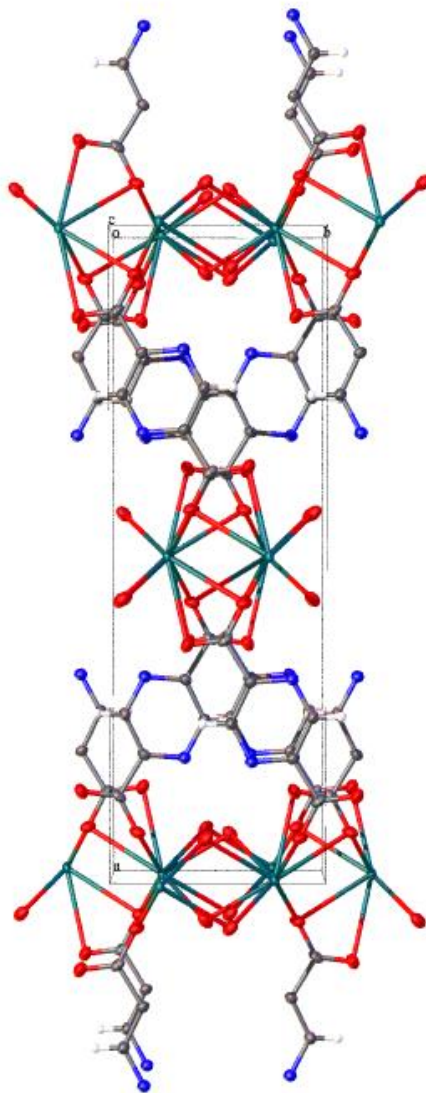

Packing along c axis (Olex2-POV-Ray representation)
