# Supplementary material for: Coordination polymers from alkaline-earth nodes and pyrazine carboxylate linkers
Source: Royal Society of Chemistry journal article supplement (doi:10.1039/c8dt02177e), 2018-01-01
Supplement: c8dt02177e3.pdf [file c8dt02177e3.pdf]

# CaHNTA

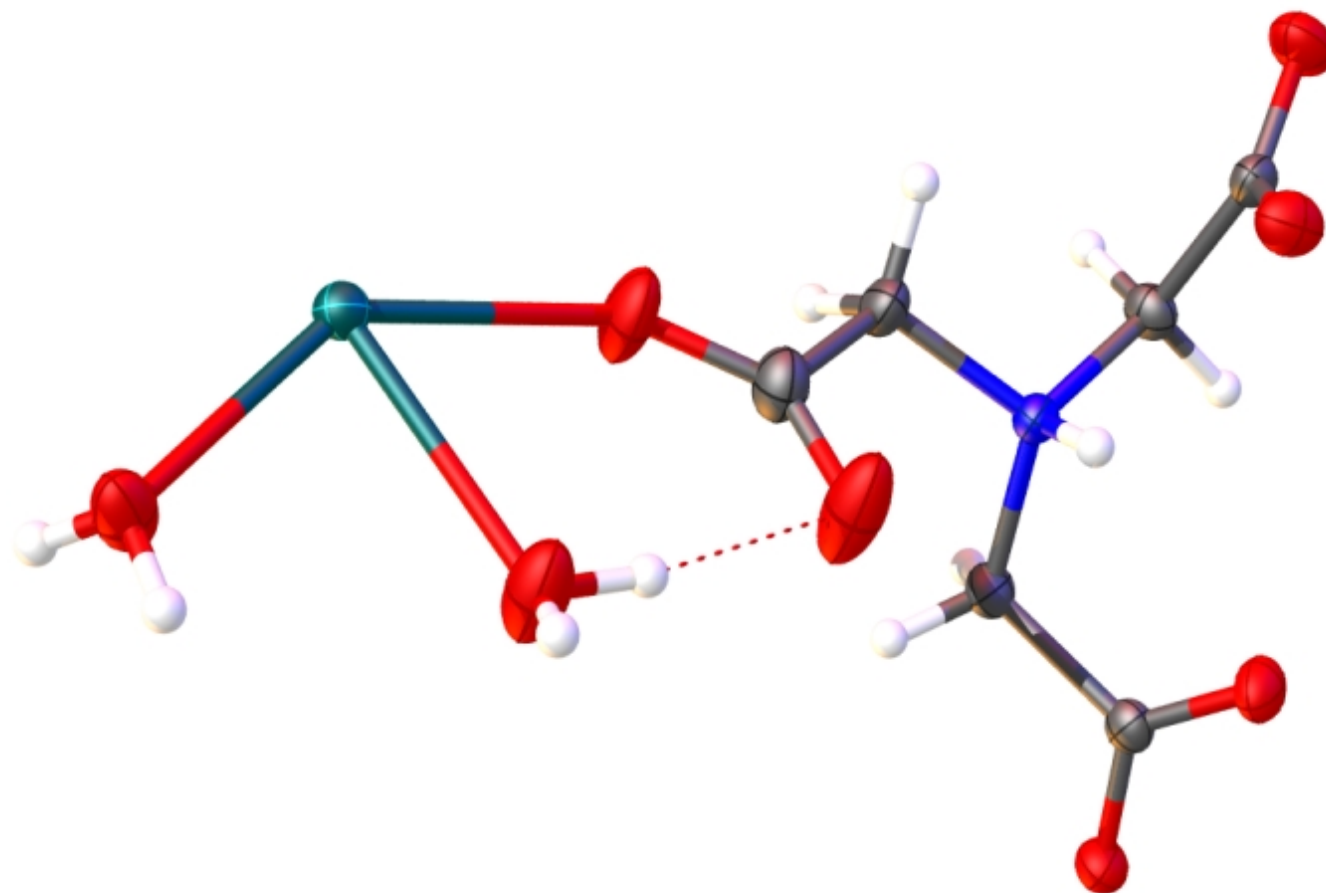

CaHNTA

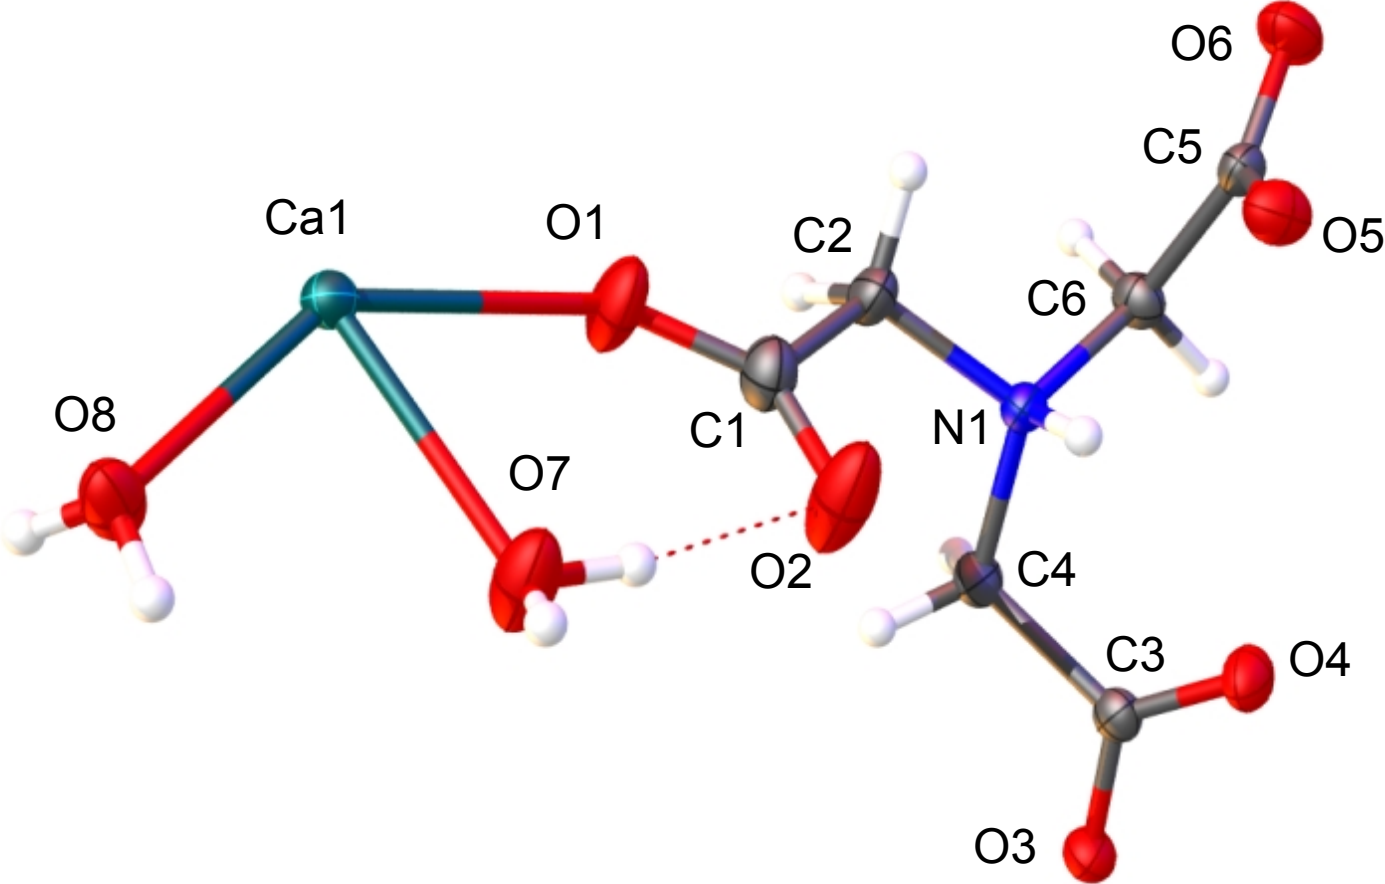

CaHNTA

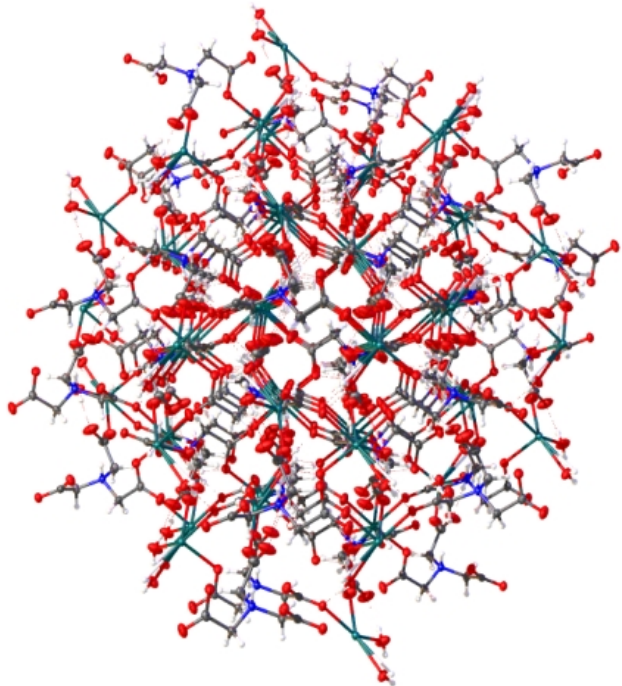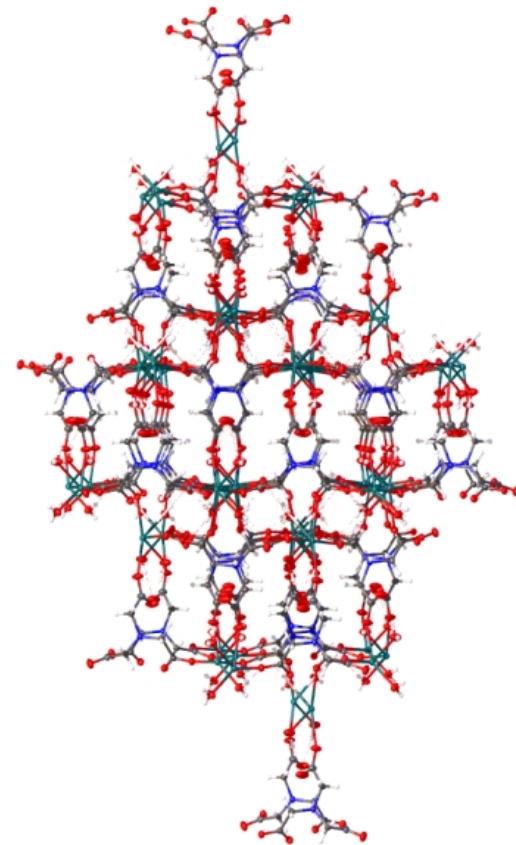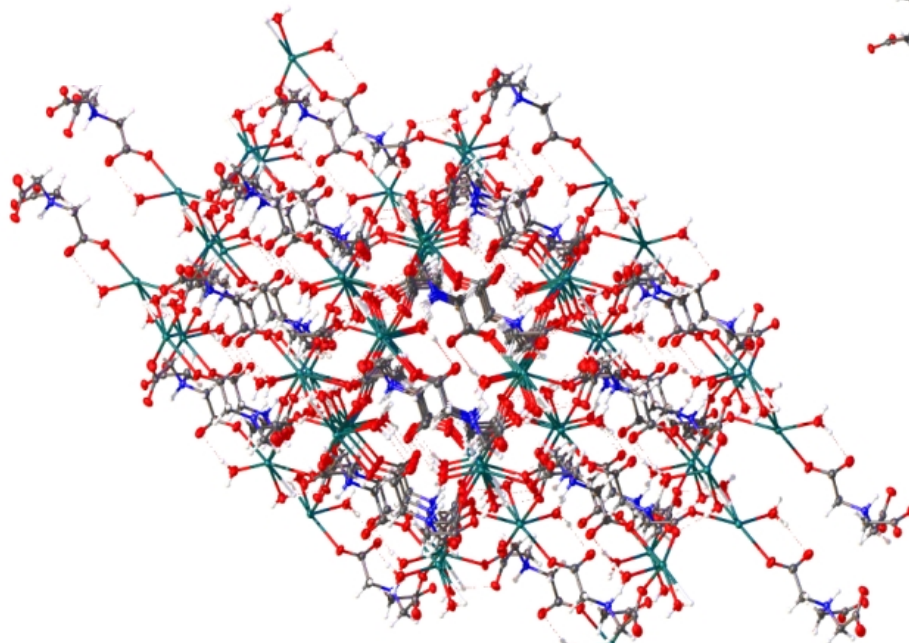

Packing along *a*, *b*, *c* axes (Olex2-POV-Ray representation)

BaHNTA-2

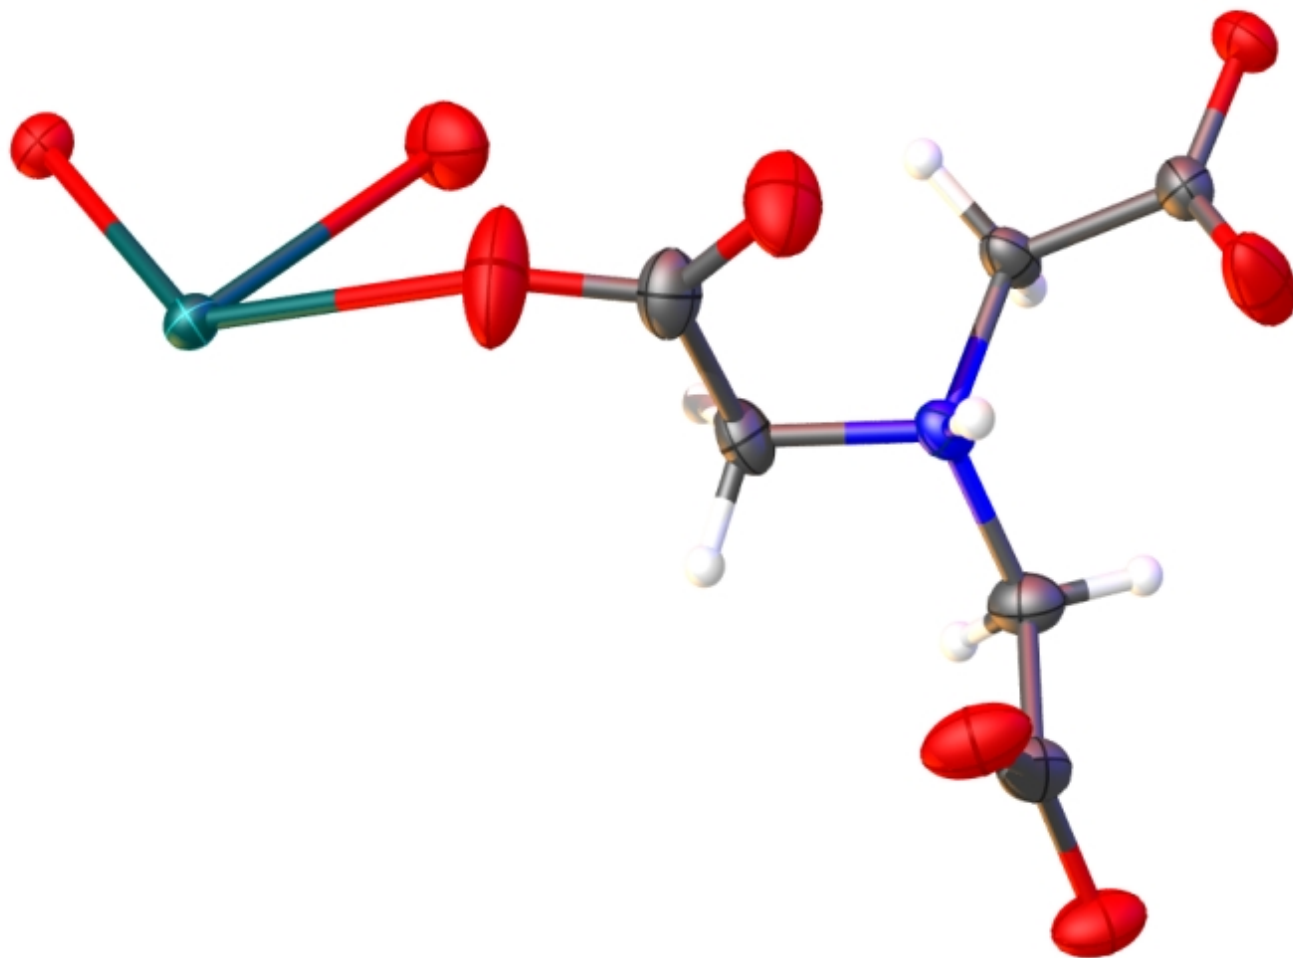

BaHNTA-2

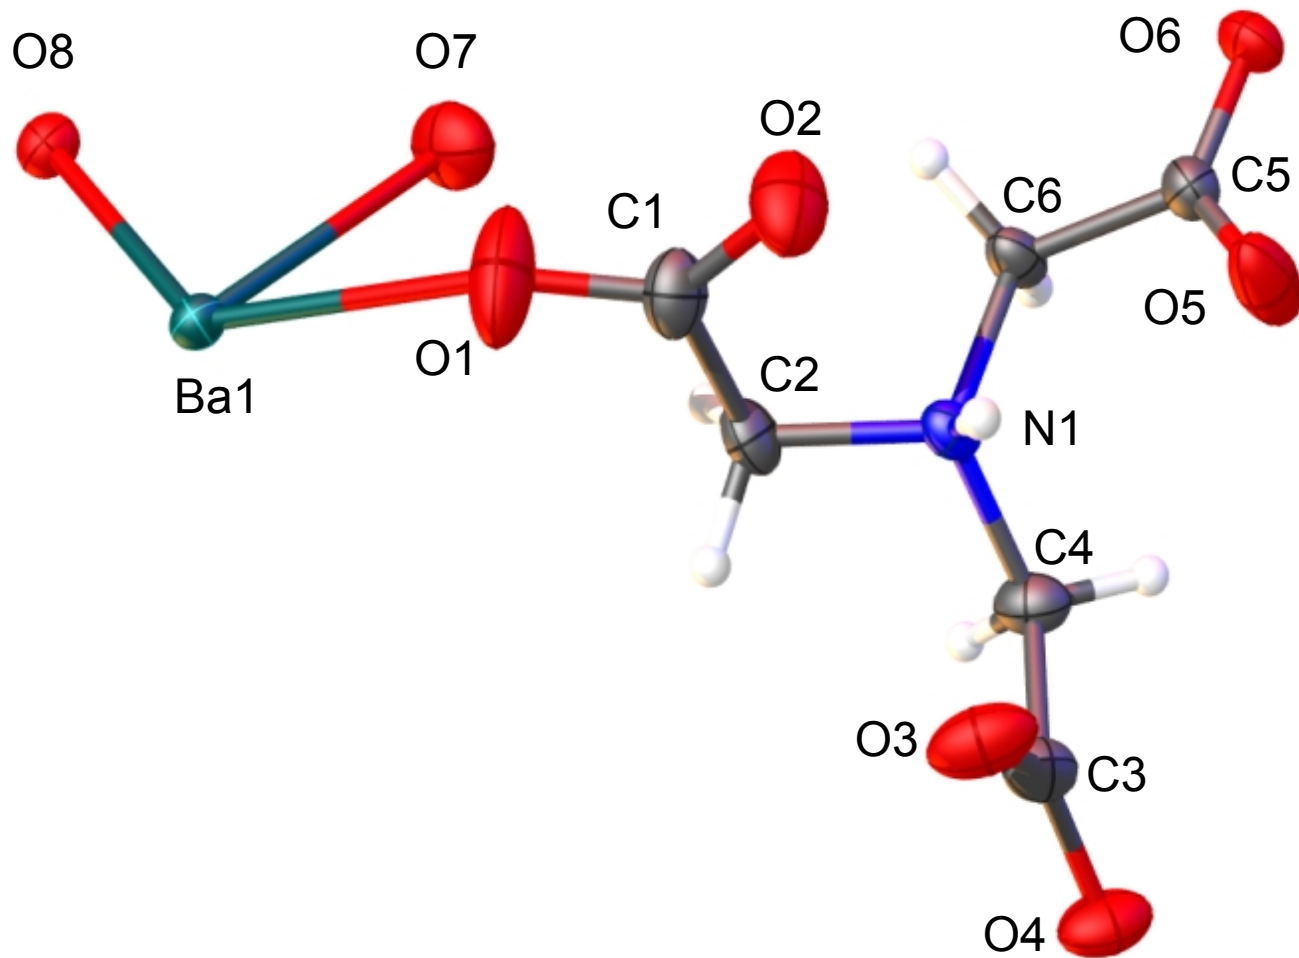

BaHNTA-2

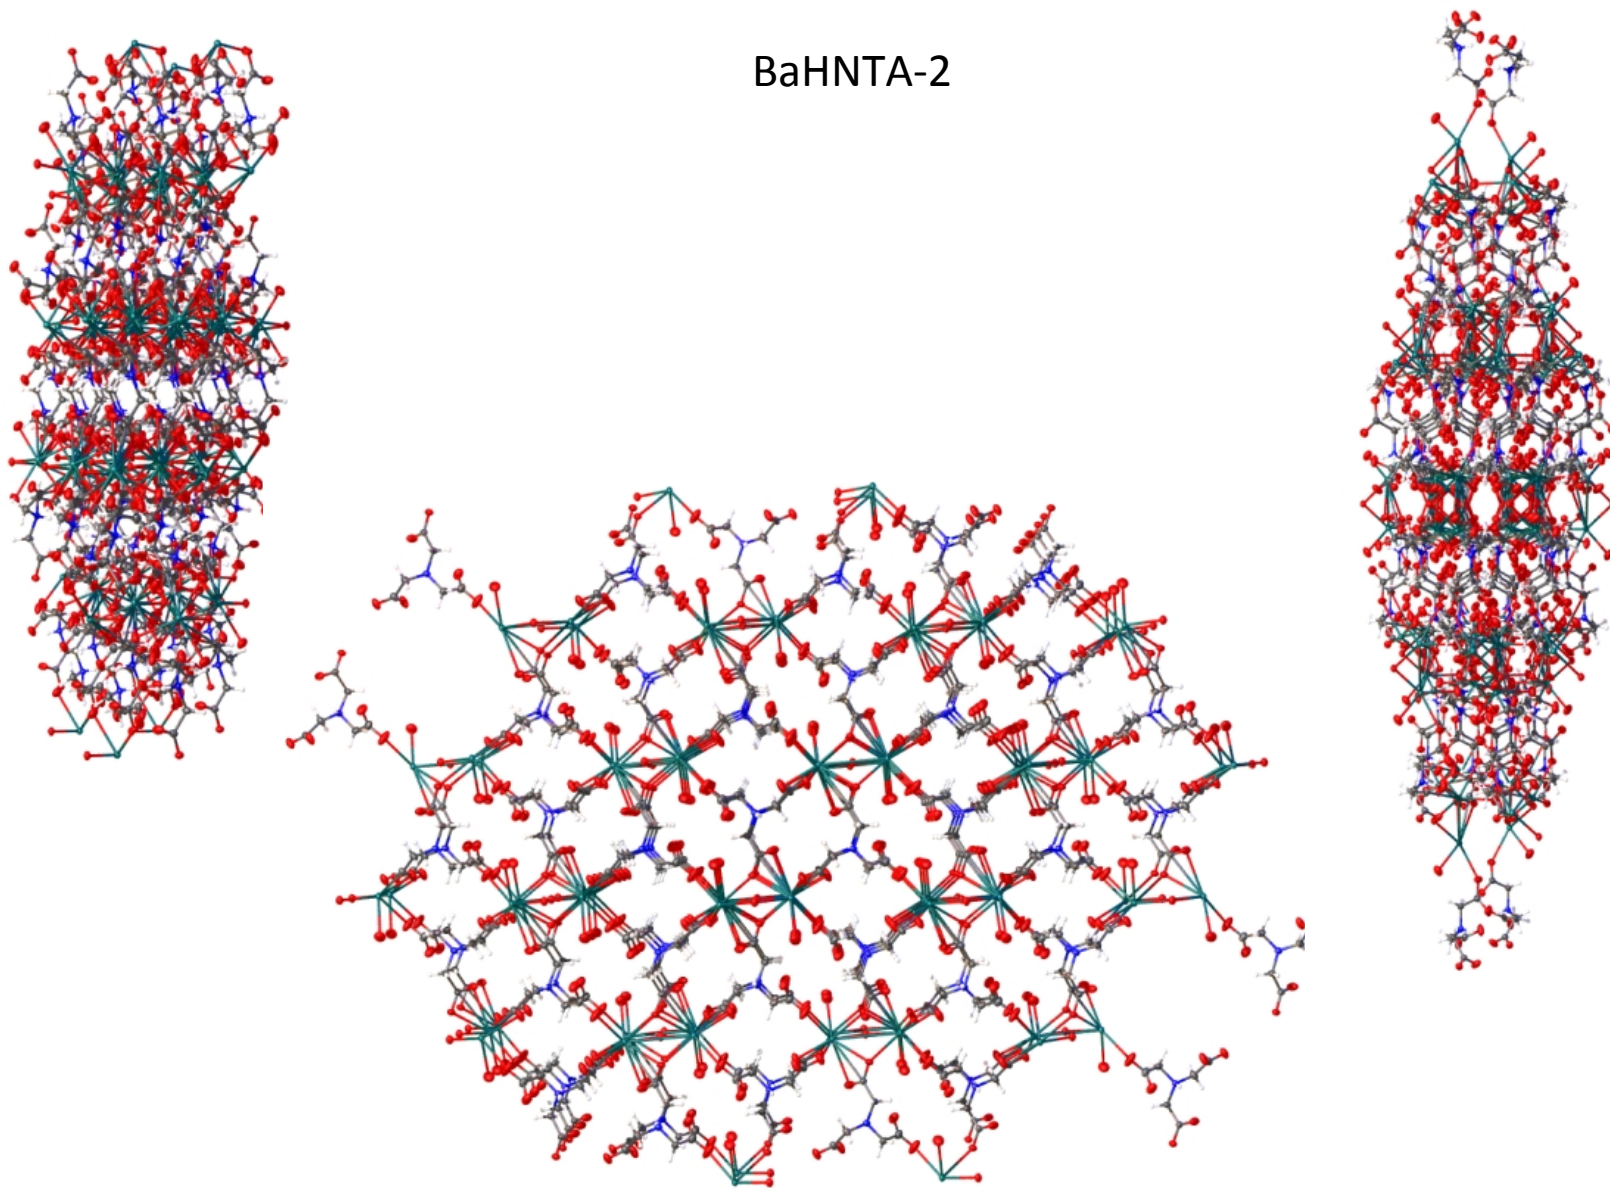

Packing along *a*, *b*, *c* axes (Olex2-POV-Ray representation)



SrHNTA

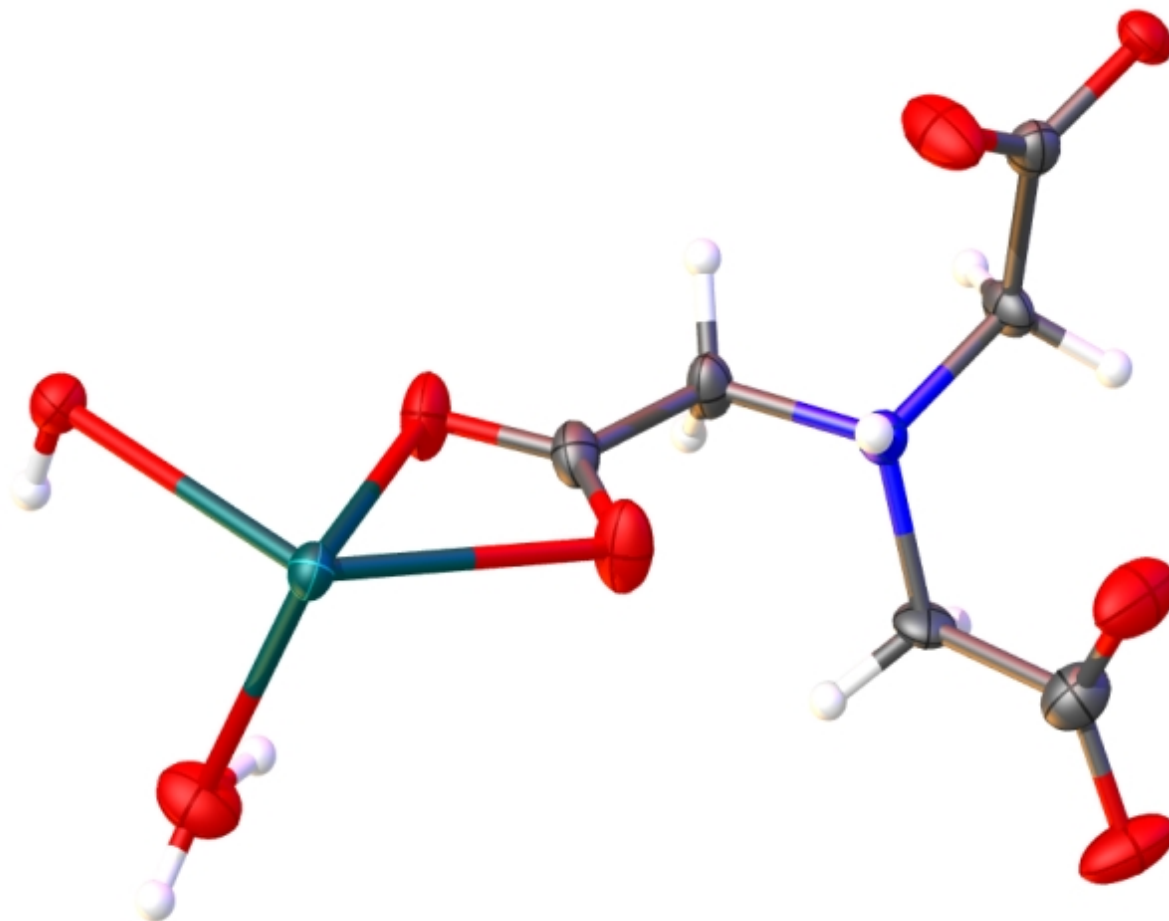

# SrHNTA

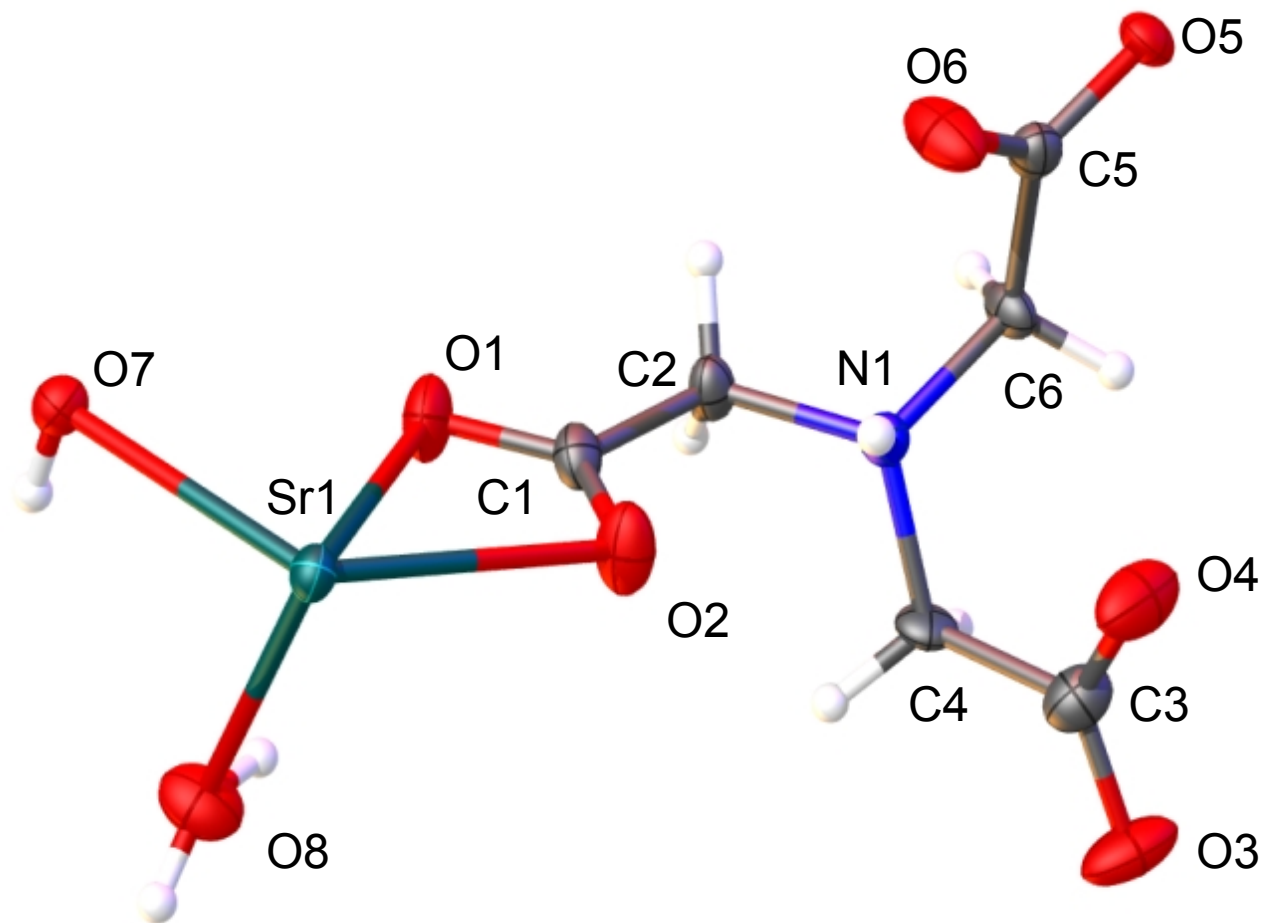



# SrHNTA

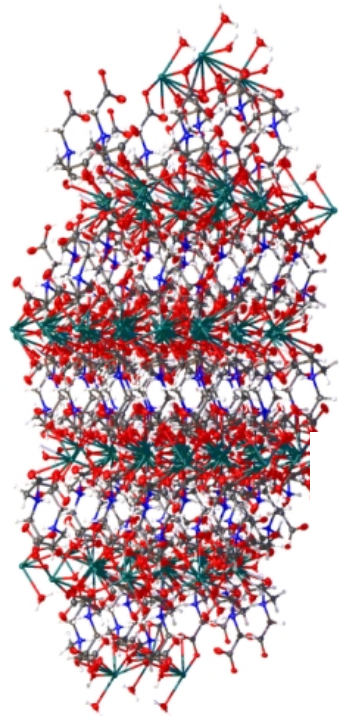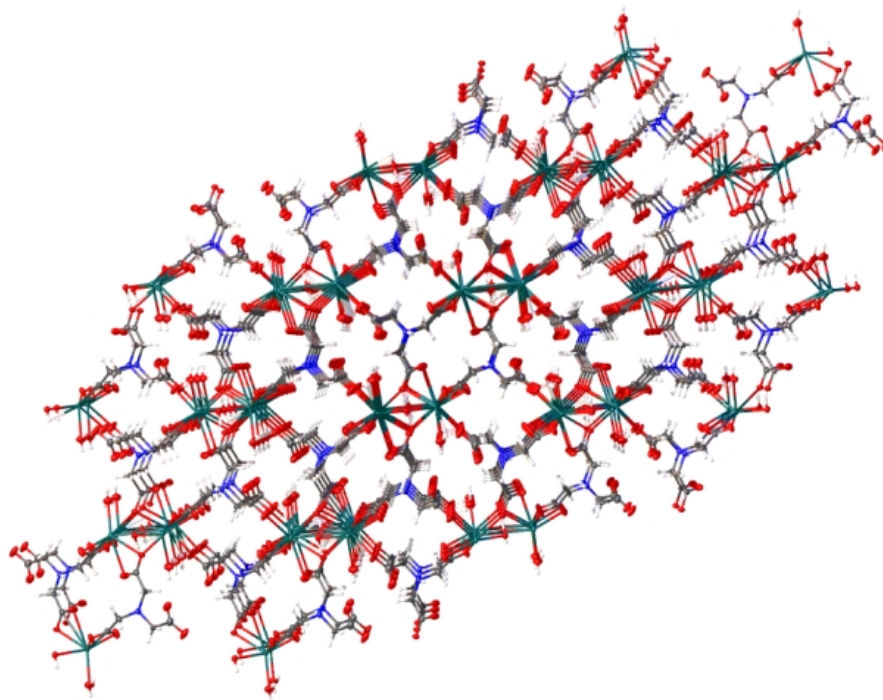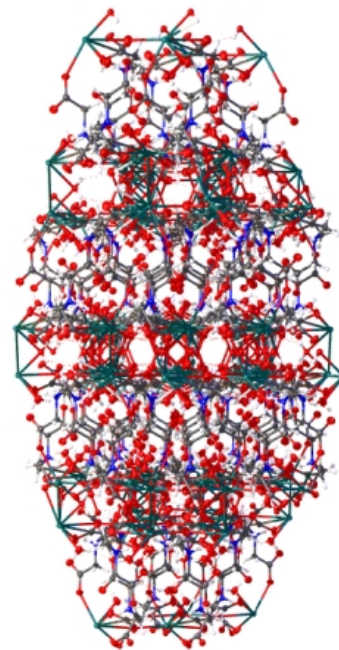

Packing along *a*, *b*, *c* axes (Olex2-POV-Ray representation)
